# Supplementary material for: Salicylic acid amplifies Carbachol-induced bronchoconstriction in human precision-cut lung slices
Source: PubMed Central journal article supplement (PMC6458705; doi:10.1186/s12931-019-1034-x), 2019-04-11

Figure S1. DNCB has little effect on carbachol-induced bronchoconstriction in hPCLS

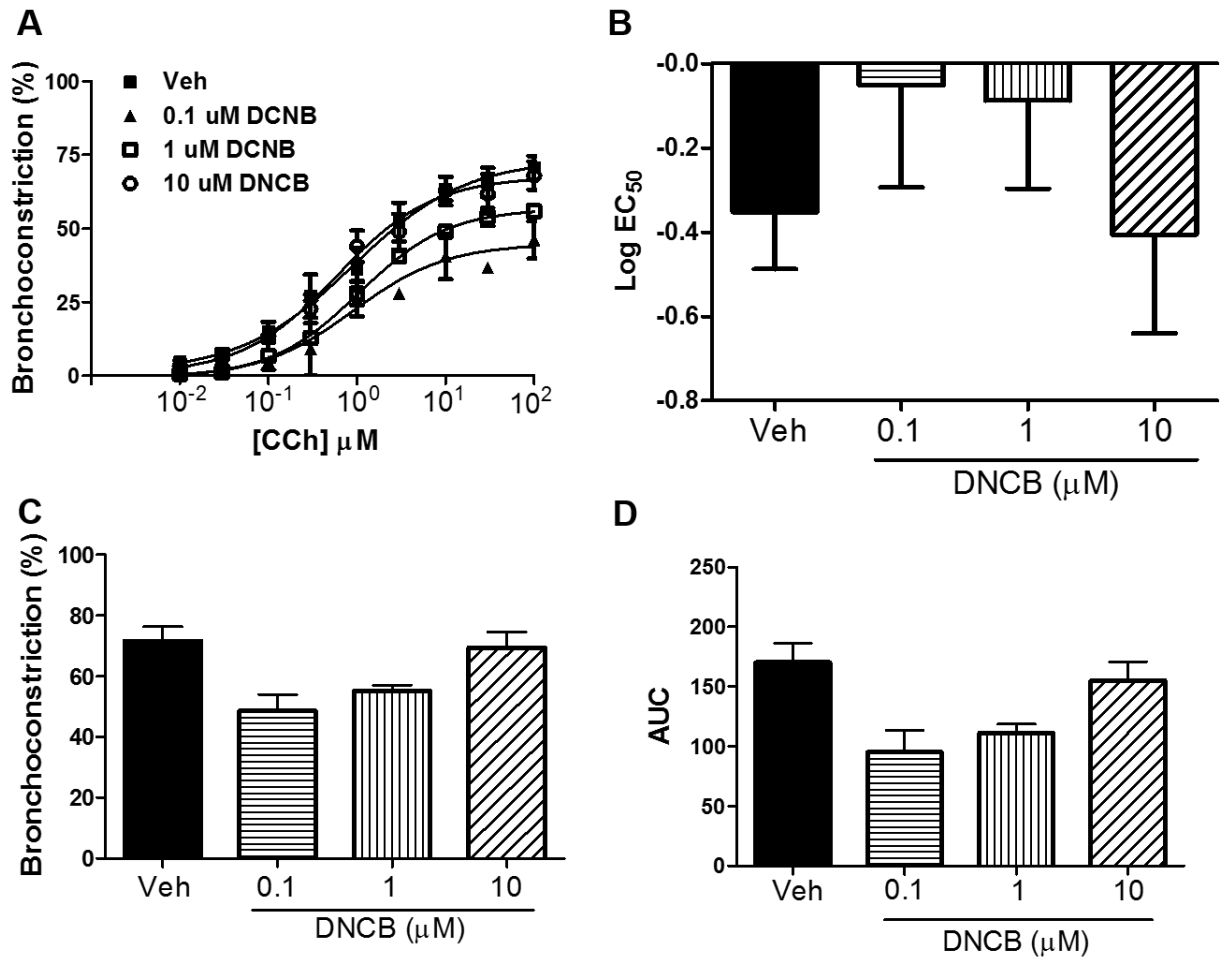

Supplement: 12931_2019_1034_MOESM2_ESM.pdf [file 12931_2019_1034_MOESM2_ESM.pdf]
